# Supplementary material
Source: PubMed Central journal article supplement (PMC6708373)
Supplement: pnas.1903059116.sapp.pdf [file pnas.1903059116.sapp.pdf]

# PNAS

[www.pnas.org](http://www.pnas.org)

Supplementary Information for

Paradoxical association of TET loss of function with genome-wide hypomethylation

Isaac F. López-Moyado, Ageliki Tsagaratou, Hiroshi Yuita, Hyungseok Seo, Benjamin Delatte, Sven Heinz, Christopher Benner, and Anjana Rao

Anjana Rao  
Email: [arao@lji.org](mailto:arao@lji.org)

**This PDF file includes:**

Supplementary text (Methods)  
Figures S1 to S6  
Tables S1 to S6  
SI References

## Methods

**External data.** The external data was downloaded from Gene Expression Omnibus (GEO) and the European Nucleotide Archive (ENA). See *Table S1-S2* for details on datasets.

**WGBS mapping and analysis.** We employed BSMAP (v2.9) (1) to align reads from bisulfite-treated samples to the mm10 mouse reference genome allowing 4 mismatches. Reads mapping to multiple locations in the reference genome with the same mapping score were removed as well as the 5' ends bearing quality lower than 20 (mapping parameters: `-n 1 -v 4 -w 2 -r 0 -q 20 -R -p 8`). Single and paired-end reads were mapped as appropriately.

Duplicate reads caused by PCR amplification were removed by BSeQC (v1.0.3) (2) using default parameters. An effective genome size of 1.87e9 (as suggested in BSeQC for *Mus musculus* genome) was employed to calculate maximum coverage at the same genomic location. In addition, BSeQC was employed for removing DNA methylation artefacts introduced by end repair during adaptor ligation. For paired-end sequencing, overlapping segments of two mates of a pair were reduced to only one copy to avoid considering the same region twice during the DNA methylation quantification.

To estimate CpG DNA methylation, we employed the methratio.py tool included in BSMAP (v2.9) (1), merging DNA methylation at each CpG di-nucleotide (combining CpG methylation ratios on both DNA strands). We required each CpG to be covered by at least 5 reads (merging biological replicates) in order to be considered in the downstream analysis. Only CpGs within the autosomes were considered for the analysis (no sex chromosomes included). For the window analysis and the integration with Hi-C data, we only considered for the analysis 1 kb windows with at least 3 CpGs, and 10kb windows with at least 10 CpGs.

**Hi-C mapping and analysis.** Reads corresponding to each extreme of a fragment were trimmed after the corresponding restriction site (e.g. MboI in the case of the NKT datasets) using HOMER (3) *homerTools trim* and independently mapped employing BWA-aln (v0.7.13) (single-end mode) (4). Reads were filtered out if they had a MAPQ score of less than 30, and only reads that were at least 25 bp were considered for the rest of the analysis. Only reads falling within the autosomes were considered for the analysis (no sex chromosomes included).

Hi-C analysis was performed using HOMER (3) and its Hi-C data analysis suite. Independently-mapped reads were paired using the *makeTagDirectory* command, allowing only 1 tag per bp (`-tbp 1`). Reads were filtered to remove uninformative reads (contiguous genomic fragments, self-ligation, re-ligation, and reads originating from regions of unusually high tag density) and also filtered based on the distance to restriction sites (`-genome mm10 -removePEbg -restrictionSite GATC -both -removeSelfLigation -removeSpikes 10000 5`).

To perform the principal component analysis (PCA) of Hi-C data (A/B compartment identification), we used the tool *runHiCpca.pl* on the normalized interaction matrix, with the options `-res 50000 -superRes 100000 -genome mm10`. For analysis involving the Hi-C A/B compartments (e.g. integration with WGBS data), only the bins associated to the same Hi-C compartment in all biological replicates (of a given sample) were considered in the analysis.

**CMS-IP and TAB-seq mapping and analysis.** CMS-IP data were mapped in a similar way to WGBS. Signal per 1kb window (log<sub>2</sub> enrichment over input) was computed using MEDIPS (Bioconductor package) (5), using the functions *MEDIPS.createSet* (with the options `extend=300`,

*shift=0, window\_size=1000, BSgenome="BSgenome.Mmusculus.UCSC.mm10", uniq=1e-5, paired=F* for single-end data; *extend=0, shift=0, window\_size=1000, BSgenome="BSgenome.Mmusculus.UCSC.mm10", uniq=1e-5, paired=T* for paired-end data) and MEDIPS.meth (with the options *p.adj = "bonferroni", diff.method = "edgeR", minRowSum = 10, diffnorm = "tmm"*) for statistical comparisons. TAB-seq data were processed in a similar way to WGBS data.

**ChIP-seq and ATAC-seq mapping and analysis.** ChIP-seq and ATAC-seq data were mapped employing BWA v0.7.13 (4). Depending on the read length and sequencing type, BWA-aln was used in single or paired-end mode to map reads that were shorter than 70 bp, and reads with length  $\geq 70$  bp were mapped using BWA-mem. In both cases, *Mus musculus* genome (mm10 downloaded from UCSC website) was used as reference. Reads were filtered out if they had a MAPQ score of less than 30, and only reads that were at least 25 bp were considered for the rest of the analysis. Only reads falling within the autosomes were considered for the analysis (no sex chromosomes included). For differential enrichment or occupancy analysis, the signal per 1kb genomic window was computed using MEDIPS (Bioconductor package) (5), using the functions MEDIPS.createSet (with the options *extend=300, shift=0, window\_size=1000, BSgenome="BSgenome.Mmusculus.UCSC.mm10", uniq=1e-5, paired=F* for single-end data; *extend=0, shift=0, window\_size=1000, BSgenome="BSgenome.Mmusculus.UCSC.mm10", uniq=1e-5, paired=T* for paired-end data) and MEDIPS.meth (with the options *p.adj = "bonferroni", diff.method = "edgeR", minRowSum = 10, diffnorm = "tmm"*) for statistical comparisons.

**Replication timing and Lamina B data.** Processed data for replication timing (6, 7) was downloaded from <https://www2.replicationdomain.com/>

**RNA-seq mapping and transposable element (TE) analysis.** Quality and adapter trimming was performed on raw RNA-seq reads using TrimGalore! 431 v0.4.5 ([http://www.bioinformatics.babraham.ac.uk/projects/trim\\_galore/](http://www.bioinformatics.babraham.ac.uk/projects/trim_galore/)) with default parameters, retaining reads with minimal length of 25 bp. Ribosomal RNA reads were filtered out using Tagdust2. Resulting reads were aligned to mouse genome mm10 using STAR v2.5.3a (8)(Dobin et al., 2013) with alignment parameter *--outFilterMismatchNmax 4 --outFilterMultimapNmax 100 --winAnchorMultimapNmax 200*.

We employed TETranscripts (9) to quantify gene and transposable element transcript abundances. This program proportionally assigns read counts to the corresponding gene or transposable element. We used this package on mode *-multi* to be able to use ambiguously mapped reads to perform the differential expression analysis. We used the transcript annotations of the mouse genome mm10, and the repeat element annotation from UCSC RepeatMasker track of mouse genome mm10.

The DESeq2 package v1.14.1 (10) was used to normalize the raw counts and identify differentially expressed genes or transposable elements (FDR cutoff of  $p < 0.1$ ). Genes or repeat elements with less than 10 reads total were pre-filtered in all comparisons as an initial step. For total (ribodepleted) RNA-seq sample analysis, the highest expressed genes were used as control genes for size factor estimation in DESeq2. For polyA+ RNA-seq sample analysis, *p*-values of two independent experiments (same biological conditions, different library preparation methods, TruSeq and SMARTseq) were combined using the Fisher method, as implemented in the R package metaRNASeq (<https://cran.r-project.org/web/packages/metaRNASeq>).

**Whole-genome sequencing (WGS) mapping.** WGS libraries were sequenced on the Illumina HiSeq 2500 using paired-end reads at a >20X coverage per sample. Adapters and low-quality bases were trimmed before mapping, and reads with length  $\geq 70$  bp were mapped to the *Mus musculus* genome (mm10 downloaded from UCSC website) using BWA-mem (4) with default options. Optical duplicate reads were removed Picard MarkDuplicates tool.

**Tumor-specific variant calling.** Following GATK (11) best practices for variant detection, additional pre-processing steps including recalibration of base quality scores were performed prior to variant detection. MuTect2 (12) somatic variant caller was employed to identify single-nucleotide variants (SNVs), using matched (samples Mouse A, B and C) tail information as normal (non-tumor tissue), as well as a panel of mutations observed in the recipient B6.SJL-PtprcaPep3bBoyJ mice (recipient mouse strain). In order to avoid false detection of tumor-specific SNVs (false positives), the variant calling process was repeated in a pairwise manner using the unmatched tails as normal (e.g. *Tail B and C for Mouse A*), and only SNVs detected in all three comparisons were included in the analysis. SNV filtering was performed using MuTect2 (12) default parameters. Mutational signature analysis was performed with Bioconductor's package MutationalPatterns (13). ANNOVAR (14) was used to perform functional annotation of mutations (synonymous, nonsynonymous, frameshift and nonsense mutations).

**TCR repertoire analysis.** The overlapping paired-end reads (250x250) were merged into a single longer read, and ClonotypeR (18) was employed to detect clonotypes in the sequence reads, extract the CDR3 sequences and quantify TCR repertoire abundances.

**Mice.** Mice were housed in a pathogen-free animal facility at the La Jolla Institute. They were used according to protocols approved by the Institutional Animal Care and Use Committee (IACUC). *Tet2*<sup>-/-</sup> mice were generated by crossing *CMVCre* mice to *Tet2fl/fl* mice, in which exons 8, 9 and 10 that code for the catalytic HxD domain, were floxed (flanked by LoxP sites) (15). *Tet3fl/fl* mice were generated by targeting exon 2 (16) *Tet2*<sup>-/-</sup> and *Tet3fl/fl* mice were crossed with *CD4Cre* (17) mice to generate *Tet2*<sup>-/-</sup> *Tet3fl/fl* *CD4Cre* mice (DKO mice). The *Tet2/3* DKO mice are in the C57BL/6 background. B6.SJL-PtprcaPep3bBoyJ (CD45.1<sup>+</sup>) mice, C57BL/6 (CD45.2<sup>+</sup>) mice were purchased from Jackson laboratory (B6(C)-*Cd1d1tm1.2Aben/J*). Both male and female mice were used in this study with similar findings. Invariant NKT cells were isolated from young mice (3-4 weeks old). The recipients were of the same sex as the donors. Both male and female recipients were used and similar results were obtained.

**Flow Cytometry associated with NKT cell experiments.** Cells were isolated from thymus, spleen, lymph nodes and bone marrow. Surface staining was performed using antibodies from Biolegend and eBioscience: CD4 (RM4-5), CD8 (53-6.7), TCRb (H57-597), B220 (RA3-6B2), CD45.1 (A20), CD45.2 (104). TCRVb2 (B20.6), TCRVb 5.1, 5.2 (MR9-4), TCRVb7 (TR310), TCRVb8.1, 8.2 (MR5-2) were purchased from BD Pharmingen. aGalCer-CD1d tetramer was obtained from the NIH Tetramer Core. V $\alpha$ 14i NKT cells were routinely defined as TCRb intermediate, B220-negative and positive for aGalCer-CD1d tetramer binding. For the pH2Ax staining the Alexa Fluor 647 anti-H2Ax-Phosphorylated (Ser139) (clone 2F3)(Biolegend) was used. Acquisition was performed in a BD LSR Fortessa (BD Biosciences) using the BD FACSDiva Software. Data analysis was performed with FlowJo (Treestar).

**Isolation of V $\alpha$ 14i NKT cells.** V $\alpha$ 14i NKT-cell preparations for adoptive transfer and DNA isolation experiments were performed using in case of control mice a pool of cells (isolated from thymus or spleen as indicated on each case) from C57BL/6 mice and from age- and sex-matched DKO mice.

For fluorescence-activated cell sorting (FACS), cells from wild type mice were depleted of CD19<sup>+</sup> (6D5), TER-119<sup>+</sup> (TER119), CD8<sup>+</sup> (53-6.7), CD11c<sup>+</sup> (N418), F4/80<sup>+</sup> (BM8) and CD11b<sup>+</sup> (M1/70) cells using biotinylated antibodies (Biolegend) and subsequent binding to magnetic streptavidin beads (Life Technologies). The unbound cells were incubated with 1 mg/ml Streptavidin A (Sigma Aldrich) and subsequently stained with  $\alpha$ GalCer-loaded CD1d tetramers and anti-TCR $\beta$ , after which tetramer-binding, TCR $\beta$ <sup>+</sup> cells were isolated using a FACSAria cell sorter (BD Biosciences). To obtain DKO cells, no depletion was performed since NKTs are massively expanded. Rather, B220<sup>-</sup>, tetramer-binding, TCR $\beta$ <sup>+</sup> cells were isolated using a FACSAria cell sorter (BD Biosciences).

**Adoptive transfer experiments.** NKT-sorted cells were transferred retro-orbitally to non-irradiated, fully immune-competent congenic (B6.SJL-PtprcaPep3bBoyJ) (CD45.1<sup>+</sup>) mice.

**TCR repertoire sequencing.** Va14i NKT cells were isolated by FACS from wild type and *Tet2/3* DKO young mice or were magnetically purified by recipients of *Tet2/3* DKO NKT cells. RNA was isolated with the E.Z.N.A. HP Total RNA kit (Omega) according to the manufacturer's instructions. cDNA was prepared using Superscript III (Invitrogen). Subsequently, PCR was performed for amplification of the gene segments with specific forward primers (*sequences shown below*) for Vb8.1 (primer MuBV8.1N), Vb8.2 (primer MuBV8.2N) and Vb8.7 (primer MuBV7) regions and a reverse primer for the b chain constant region (primer MuTCB3C). Amplicons were quantified and pooled using HS Qubit (Life Technologies). Adaptors (NEB) were ligated and libraries were amplified using Kapa HiFi (Kapa Biosystems). Amplified libraries were quantified using HS Qubit, their size was evaluated using Bioanalyzer and sequenced in an Illumina Miseq.

|          |                                |
|----------|--------------------------------|
| MuBV8.1N | GGC TGA TCC ATT ACT CAT ATG TC |
| MuBV8.2N | TCA TAT GGT GCT GGC AGC ACT G  |
| MuBV7    | TAC AGG GTC TCA CGG AAG AAG C  |
| MuTCB3C  | AAG CAC ACG AGG GTA GCC T      |

**Whole-genome bisulfite sequencing (WGBS) Library preparation.** Va14i NKT cells were isolated by flow cytometry and DNA was isolated using the PureLink genomic DNA mini kit (Life technologies). DNA was fragmented. 1.5  $\mu$ g of the fragmented DNA was used for the library preparation and bisulfite treatment was done as described in *ref.* 26. After the bisulfite conversion the purified DNA was amplified for 4 cycles (low amplification) using Kapa HiFi Uracil<sup>+</sup> (Kapa Biosystems). 2 independent WGBS samples per genotype were evaluated.

**Whole Genome Sequencing (WGS) Library preparation.** Genomic DNA was isolated from purified NKT cells using the PureLink genomic DNA mini kit (Life technologies). DNA was fragmented to an average size of 400 bp using the Adaptive Focused Acoustics Covaris S2 instrument. Libraries were prepared using the TruSeq DNA PCR-Free Sample Preparation kit (Illumina) according to the manufacturer's guidelines. Libraries were purified, pooled according to the instructions of the manufacturer and sequenced in an Illumina HiSeq 2500 instrument.

**Hi-C Library preparation.** Between 0.6 and 1.5x10<sup>6</sup> NKT cells were fixed in complete medium containing 1% Formaldehyde, then quenched with 125 mM glycine and washed twice with an excess of PBS. Cells were then resuspended in lysis buffer containing 0.5% SDS and lysed at 62°C for 7 minutes. This step also allows to remove proteins that were not fixed to the chromatin. SDS was further quenched with 1% Triton-X-100 at 37°C for 15 minutes. Next, permeabilized nuclei were reacted with 100 units of Mbol overnight at 37°C. After subsequent washing and

inactivation of Mbol, the restriction sites were further filled in with Biotin-14-dATP and Klenow polymerase at room temperature for 40 minutes. Samples were transferred into a ligation solution containing 600 units of T4 DNA ligase. Proximity ligation was stopped by addition of 2-fold molar excess of EDTA, and samples were decrosslinked at 65°C for 16h00. DNA was further purified by proteinase K digestion and phenol/chloroform extraction. For library preparation, 800 ng of DNA was sonicated to an average of 300bp fragments length, and was used for subsequent library preparation that includes blunting of DNA, A-tailing, ligation of sequencing adapters, and amplification of library.

**Total (ribodepleted) RNA-seq Library preparation.** 10 million cells were sorted and then whole RNA was isolated using the RNeasy Plus Mini Kit (Qiagen). Ribo-zero RNA-seq libraries were prepared using the TruSeq Stranded Total RNA Library Prep Gold kit (Illumina) with minor modifications. The starting RNA was 800 ng. Ribosomal RNAs were depleted using magnetic beads. Next, RNA was fragmented, and cDNA was synthesized using Superscript II (Invitrogen). After A-tailing and adaptor ligation, libraries were generated by amplifying the cDNA for 12 cycles.

**Statistical Analysis.** For mouse experiments, Mantel-Cox test and Gehan-Brenslow-Wilcoxon test were applied as indicated and the p values are shown for each figure. Statistical evaluations were performed using the unpaired t test. Data are mean  $\pm$  SEM. Asterisks indicate statistically significant differences: \*\*\*\*P< 0.0001, \*\*\*P< 0.001, \*\*P< 0.01, \*P<0.05. If not otherwise indicated the p value was not statistically significant (p>0.05). In the graphs each dot represents a mouse. For all the experiments we used sufficient number of mice to ensure adequate power for our conclusions. Mice from different litters and of different sex were evaluated. In addition, we ensured that a minimum of 2 independent experiments was performed in each case. No blinding was applied in this study. For the two-sample Kolmogorov-Smirnov test related to methylation analysis, the *D* statistic and pvalues were calculated using the *ks.test* function as implemented in R. In all tests, the alternative hypothesis is that CDF of WT lies below that of *TET*.

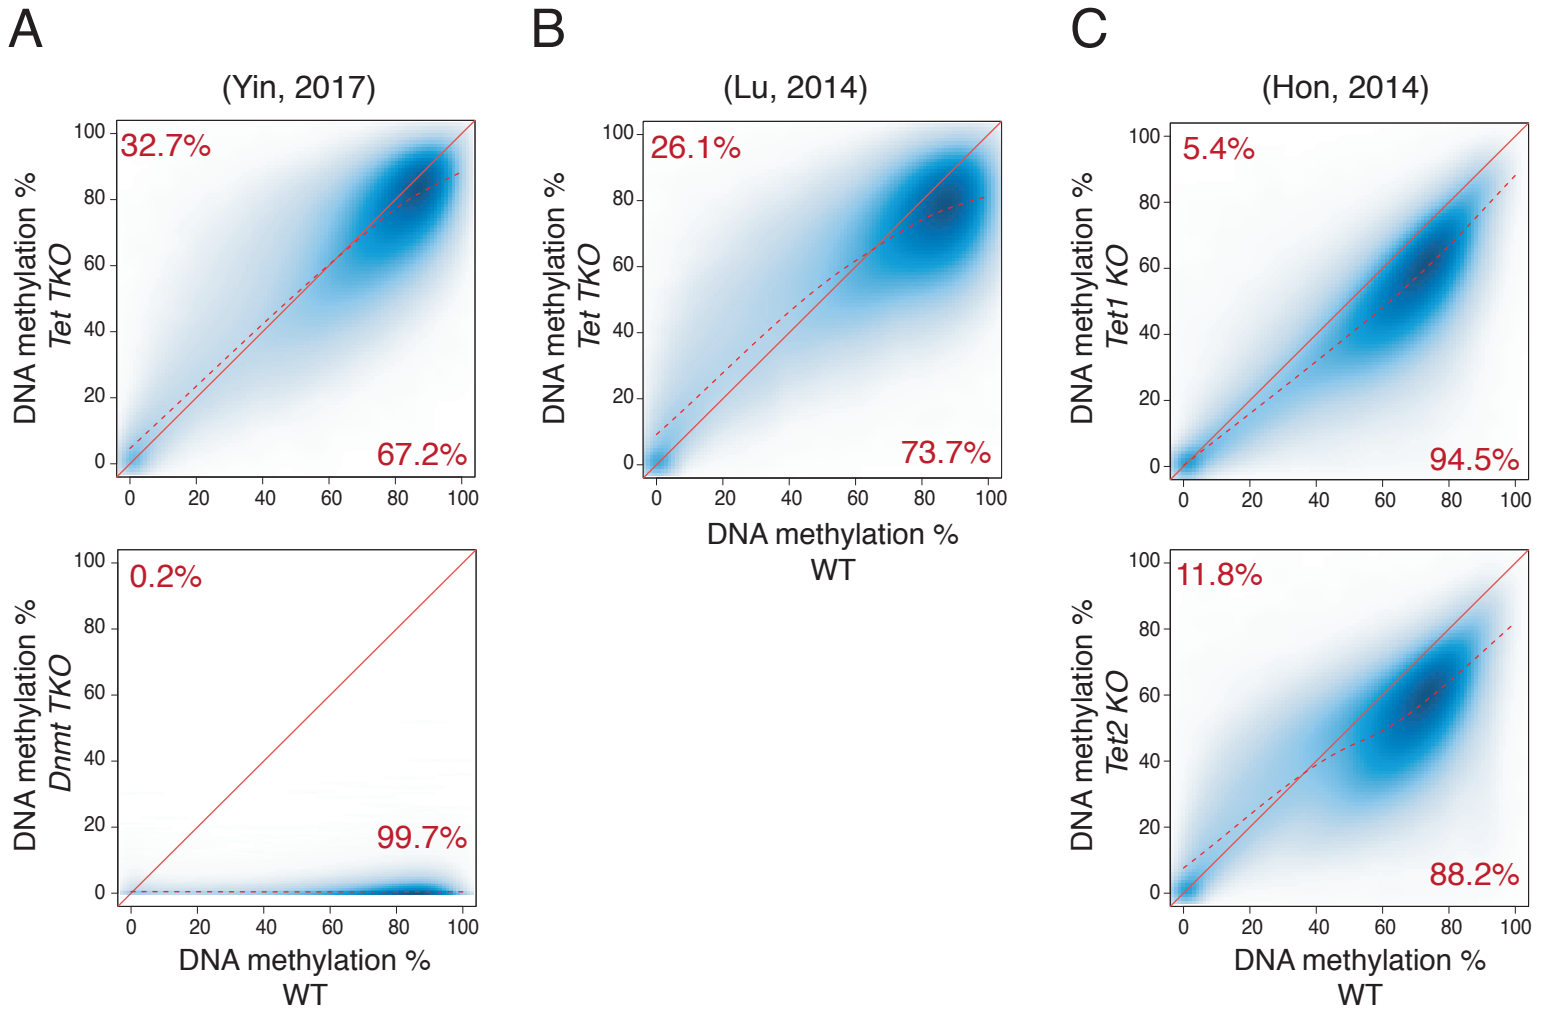

**Fig. S1.** B compartment hypomethylation in *TET*-mutant mESC. (A), Smoothed scatterplot of the average DNA methylation values within 1 kb windows across the genome, comparing WT cytosine modification values (x-axis) to the ones in *Tet TKO* (top), and *Dnmt TKO* (bottom) (y-axis). LOESS regression (dashed line) is displayed for each panel. (B), Smoothed scatterplot of the average DNA methylation values within 1 kb windows across the genome, comparing WT cytosine modification values (x-axis) to the ones in *Tet TKO* (y-axis). LOESS regression (dashed line) is displayed for each panel. (C), Smoothed scatterplot of the average DNA methylation within 1 kb windows across the genome, comparing cytosine modification values between WT (x-axis) and *Tet1 KO* or *Tet2 KO* (y-axis) mESC. LOESS regression (dashed line) is displayed for each panel. *Tet1 KO* mESC (top) show global loss of methylation whereas *Tet2 KO* mESC (bottom) show hypermethylation in regions with low-intermediate methylation in WT mESC and hypomethylation at regions with high methylation in WT mESC.

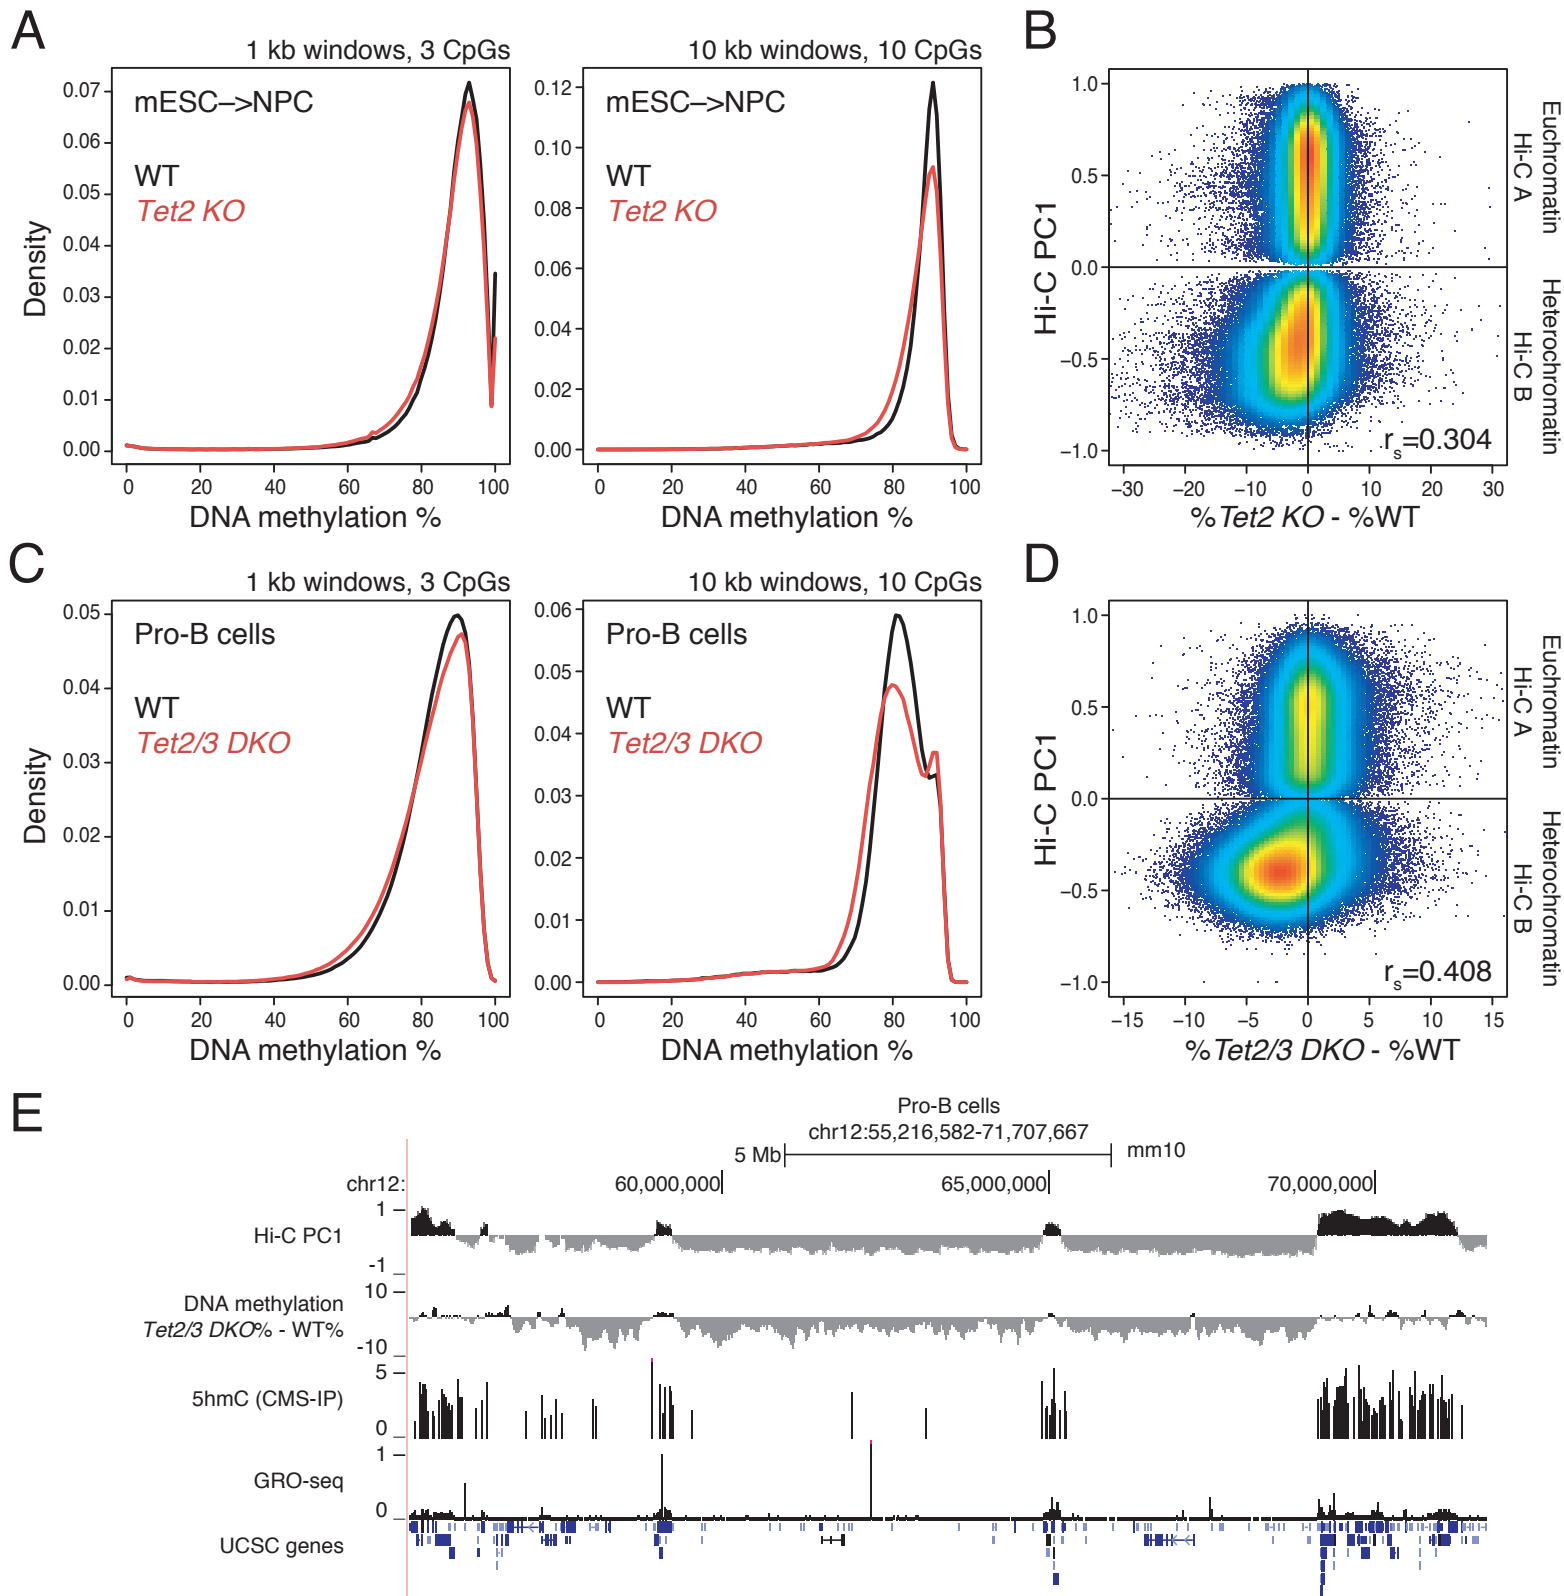

**Fig. S2.** B compartment hypomethylation in *TET*-mutant NPC and pro-B cells. (A), Distribution of average DNA methylation values within 1 kb and 10 kb windows across the genome in wild type (WT) and *Tet2 KO* mESC differentiated to neural precursor cells (NPC) at day 3 post-differentiation. (B), Correlation between DNA methylation changes (difference in cytosine modification percentage, *Tet2 KO* minus WT) and A/B compartments (Hi-C PC1 values) in mESC differentiated to NPCs. The Spearman correlation coefficient is shown ( $r_s$  value). (C), Distribution of average DNA methylation values within 1 kb and 10 kb windows across the genome, in wild type (WT) and *Tet2/3 DKO* pro-B cells. (D), Correlation between DNA methylation changes (difference in cytosine modification percentage, *Tet2/3 DKO* minus WT) and A/B compartments (Hi-C PC1 values) in mouse pro-B cells. The Spearman correlation coefficient is shown ( $r_s$  value). (E), Genome tracks showing a correspondence between heterochromatic Hi-C B compartment and large hypomethylated domains in pro-B cells (shown as subtraction of DNA methylation percentage, *Tet2/3 DKO* minus WT). RNA transcription (GRO-seq track) and 5hmC distribution (CMS-IP track) in WT pro-B cells are shown for reference.



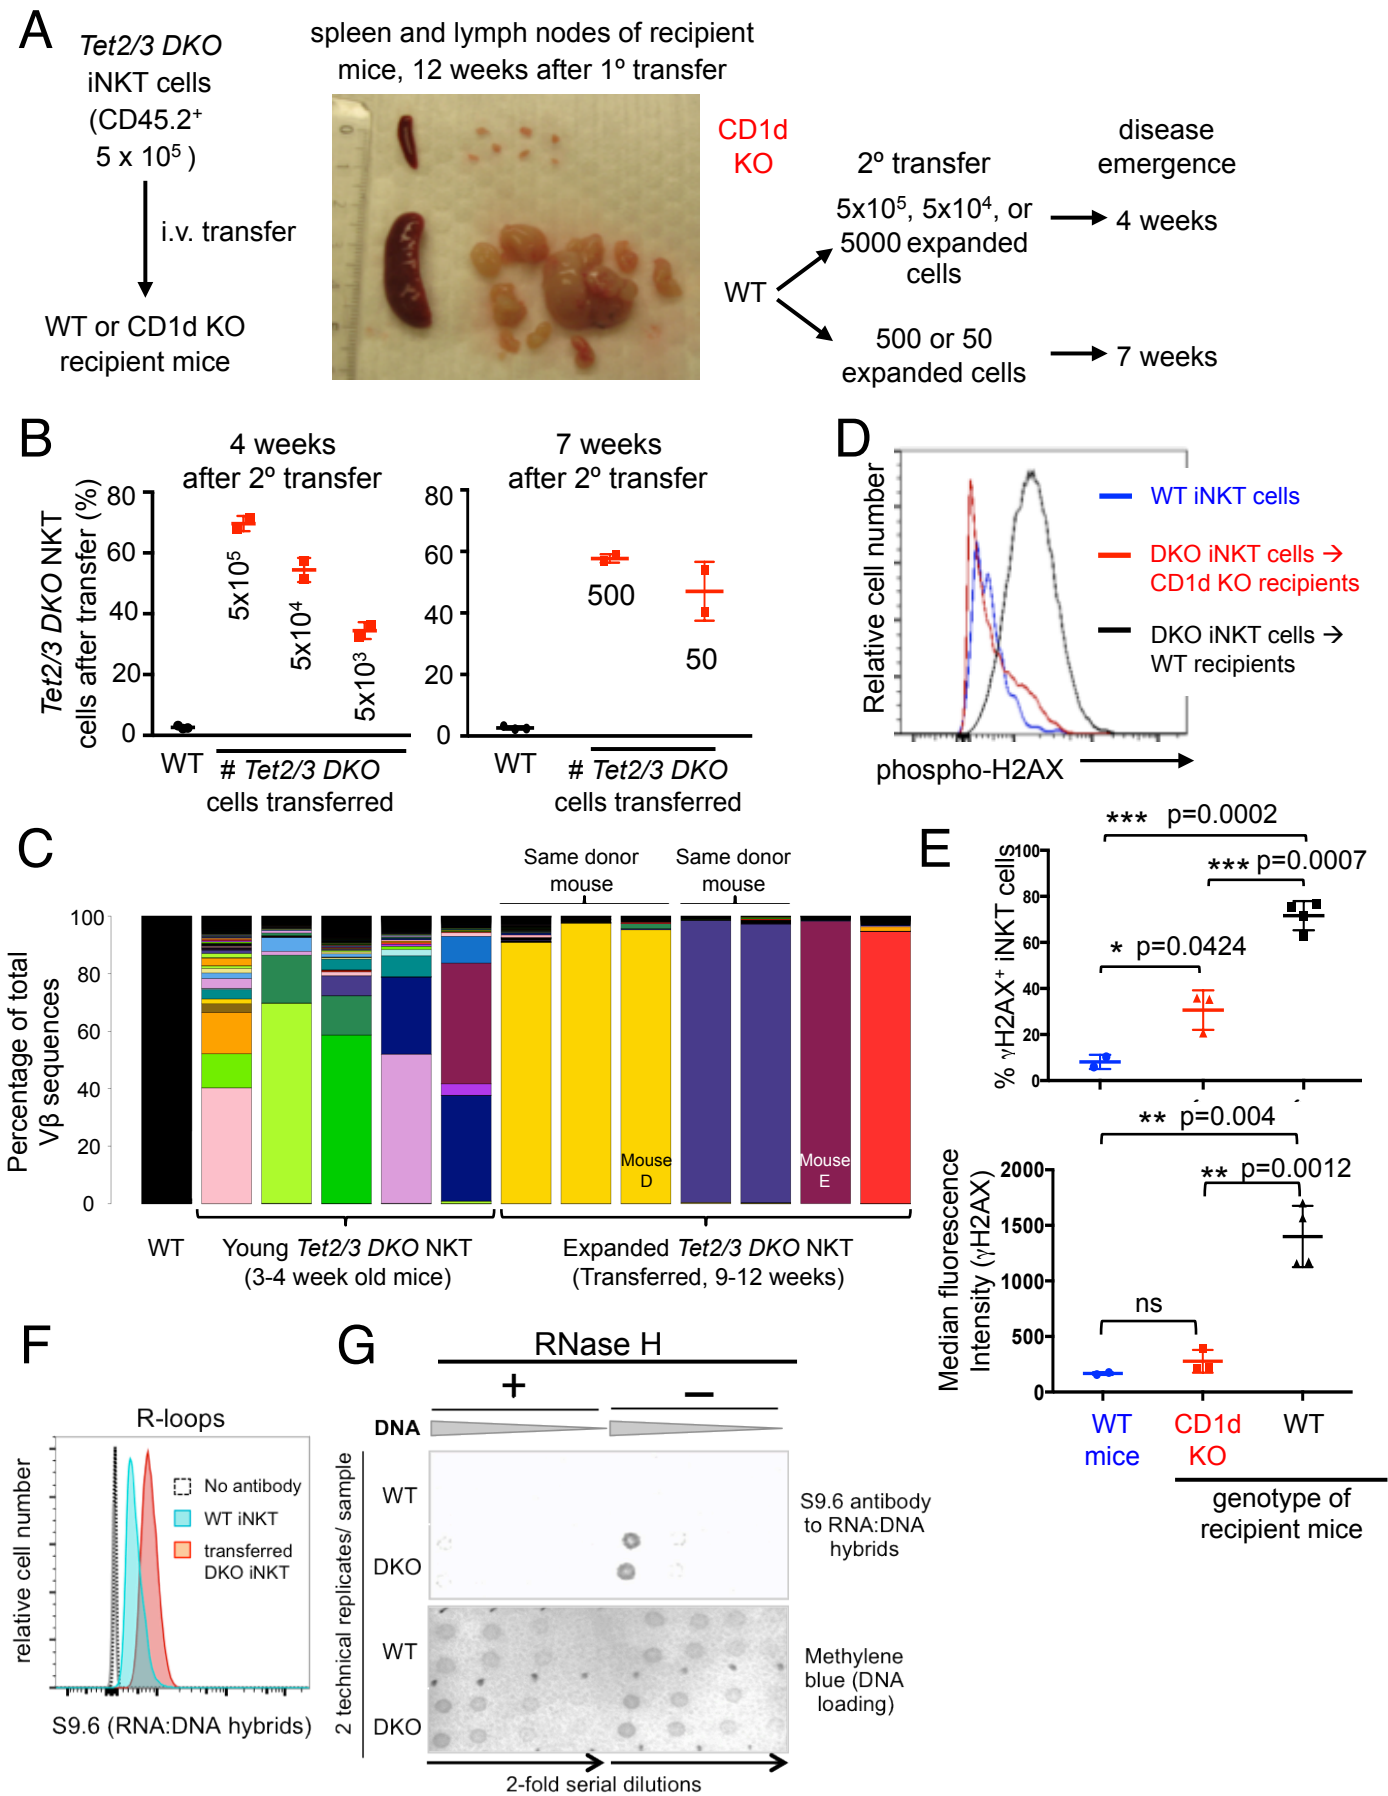

(Legend on next page)

**Fig. S3.** Expansion of *Tet2/3 DKO* NKT cells is accompanied by increased clonality, and accumulation of DNA double-strand breaks and R-loops. (A), Left, experimental workflow. Middle, the picture depicts splenomegaly and enlarged lymph nodes in wild type (WT) but not *CD1d KO* recipients of *Tet2/3 DKO* NKT cells. Right, times of disease emergence (see (B)). (B), Percentage of WT or expanded *Tet2/3 DKO* NKT cells in splenocytes of congenic WT recipient mice, injected with the indicated numbers of *Tet2/3 DKO* NKT cells. 2 mice were used per condition. Mice injected with as few as 50 *Tet2/3 DKO* cells develop NKT cell lymphoma. (C), Evaluation of TCR $\beta$  chain CDR3 variable region sequences in DNA from NKT cells. One WT mouse, five 3-4 week old *Tet2/3 DKO* mice, and seven WT recipients of 0.5 million *Tet2/3 DKO* NKT cells were evaluated. Each color represents a single TCR V $\beta$  sequence. Mice that received NKT cells from a single *Tet2/3 DKO* donor showed expansion of the same NKT cell clone. Asterisks indicate independent mice Mouse D and Mouse E for which SNV data are shown in Fig. 4B. (D), Evaluation of phospho-H2AX staining as a marker for DNA DSBs in WT and *Tet2/3 DKO* NKT cells. NKT cells ( $\alpha$ GalCer-CD1d<sup>+</sup>, TCR $\beta$ <sup>+</sup>) were isolated from healthy WT mice or after transfer of *Tet2/3 DKO* NKT cells to non-irradiated WT or *CD1d KO* recipients as outlined in (A). A representative flow cytometric analysis is shown. (E), (Top panel) Percentage of phospho-H2AX<sup>+</sup> NKT cells isolated from WT mice or from *Tet2/3 DKO* NKT cells transferred to and recovered from non-irradiated WT or *CD1d KO* recipients as outlined in (A). (Bottom panel) Median fluorescence intensity of phospho-H2AX staining in NKT cells isolated from WT or from *Tet2/3 DKO* mice after transfer to and recovery from WT or *CD1d KO* recipients as outlined in (A). Data are mean  $\pm$  SEM, n=2 (WT NKT cells), n=3 (NKT cells from *CD1d KO* recipients) and n=4 (NKT cells from WT recipients). ns, not significant. At least 2 independent experiments were performed per condition. (F), Flow cytometric analysis evaluating R-loops in NKT cells isolated from healthy WT mice (blue histogram) or from *Tet2/3 DKO* NKT cells transferred and expanded in nonirradiated immunocompetent WT recipients (red histogram). The S9.6 antibody recognizes RNA:DNA hybrids. (G), Dot blot of genomic DNA from *Tet2/3 DKO* NKT cells transferred to and expanded in non-irradiated WT recipients shows increased R-loop formation compared to WT NKT cells (top panel, right). Specificity for RNA:DNA hybrids was confirmed by RNase H treatment of genomic DNA prior to spotting, which results in elimination of the signal (top panel, left). Equivalent DNA loading was confirmed by methylene blue staining (bottom panel).

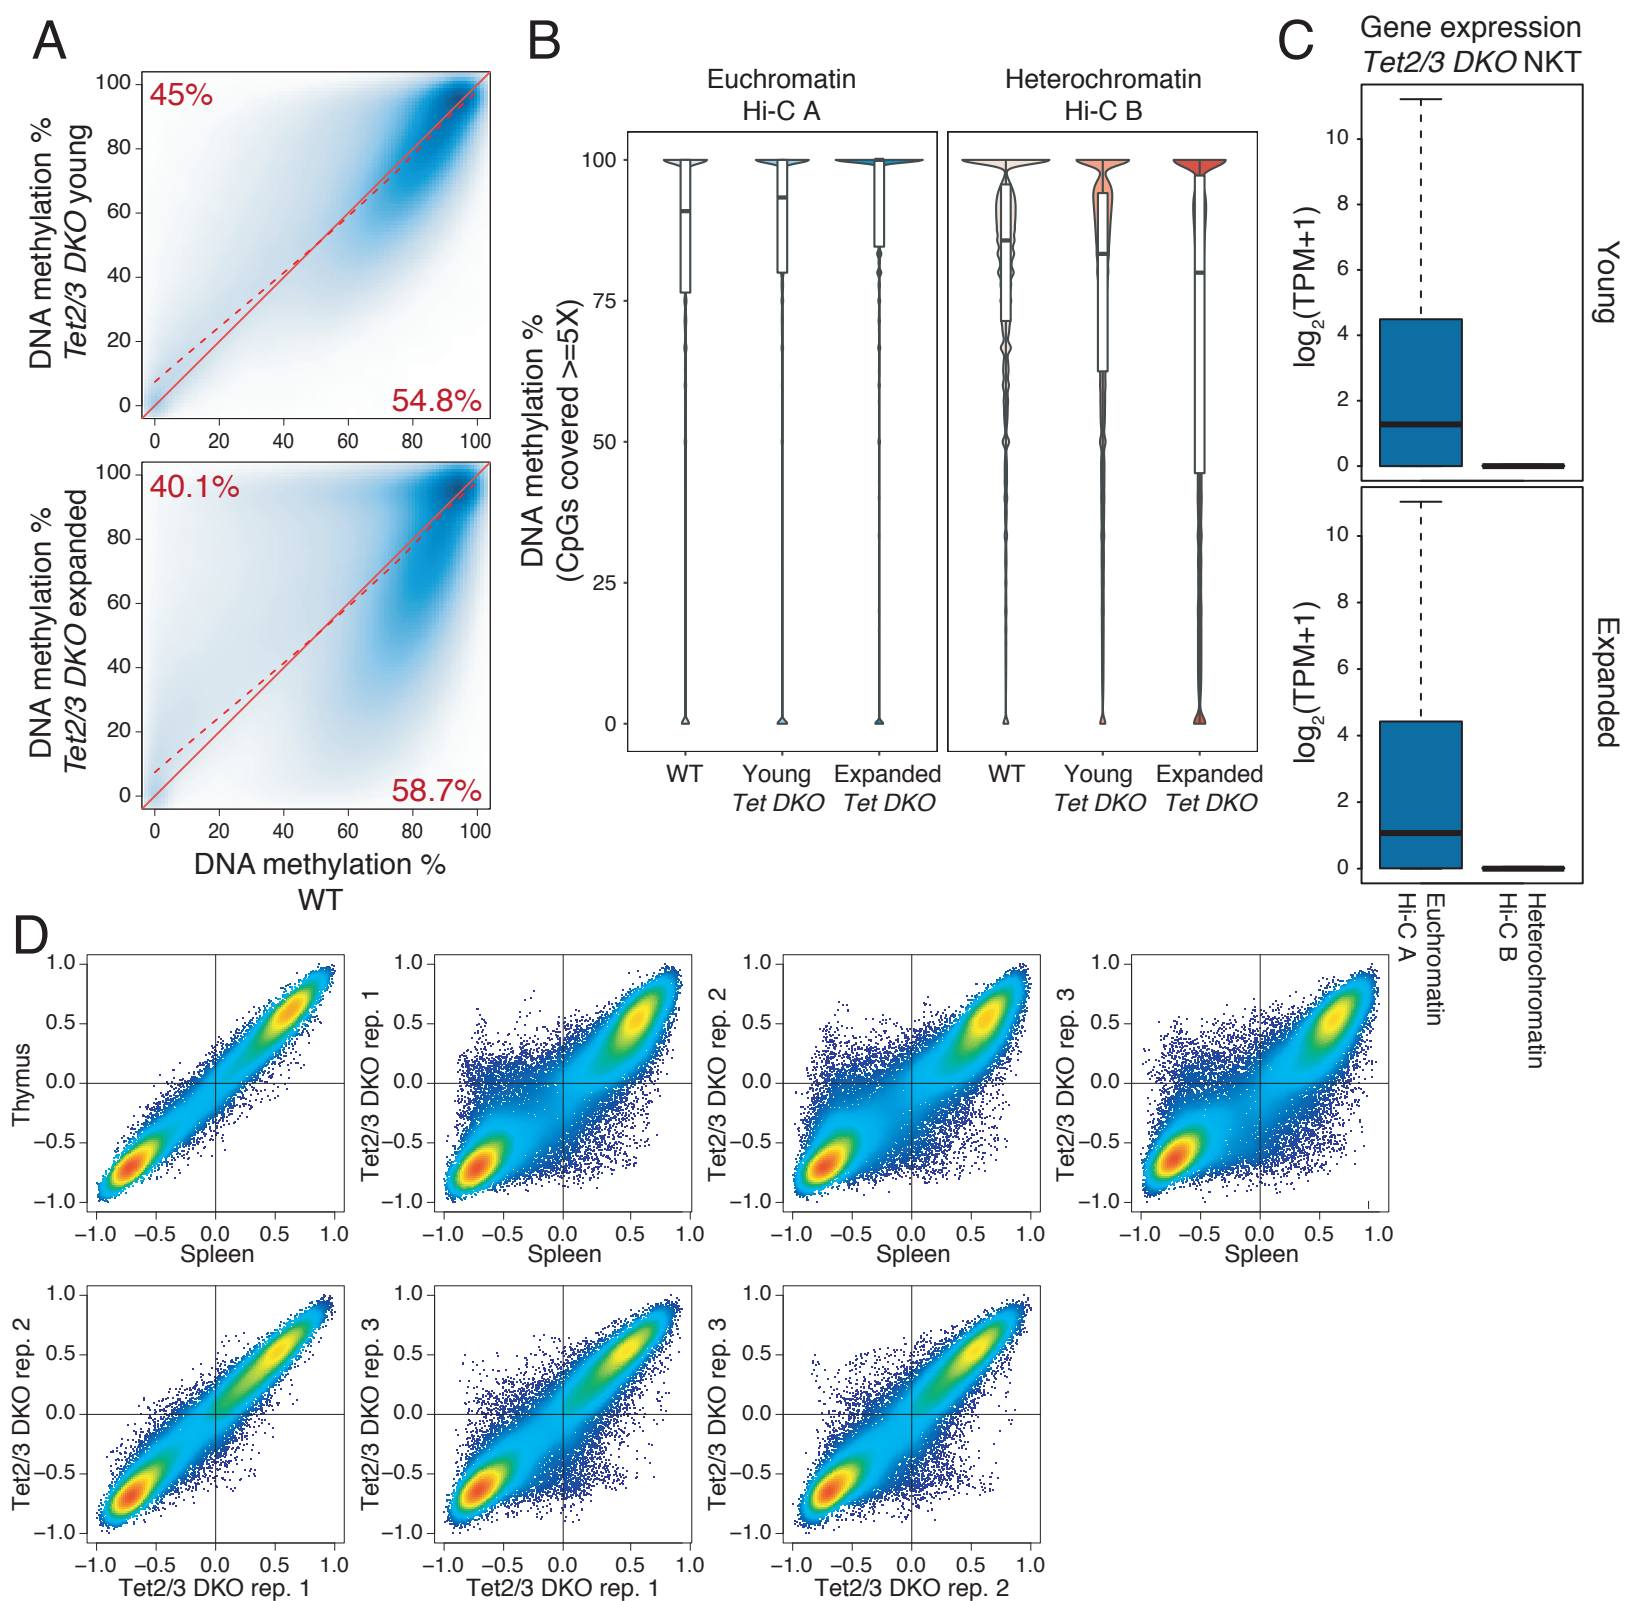

**Fig. S4.** *Tet2/3*-deficient NKT cell lymphoma displays progressive hypomethylation in the heterochromatic Hi-C B compartment. (A), Smoothed scatterplot of the average DNA methylation within 1 kb windows across the genome, comparing WT (x-axis) to young (left panel) or transferred and expanded (right panel) *Tet2/3 DKO* NKT cells (y-axis). LOESS regression (dashed line) is displayed for each panel. (B), Distribution of DNA methylation (WGBS signal) at cytosines within the CpG context covered by at least 5 WGBS reads. DNA methylation values are shown for WT, *Tet2/3 DKO* young, and expanded *Tet2/3 DKO* NKT cells. (C), Comparison of gene expression levels (RNA-seq,  $\log_2(\text{TPM}+1)$ ) in the euchromatic Hi-C A and heterochromatic Hi-C B compartments in young (left panel) and expanded (right panel) *Tet2/3 DKO* NKT cells. (D), Pairwise comparison of Hi-C PC1 values between independent samples. Note the good correlation between the WT thymus and spleen NKT cell samples and between *Tet2/3 DKO* replicates 1 and 2 which were expanded from the same donor mouse, compared to the slightly greater differences between *Tet2/3 DKO* replicates 1 and 2 and replicate 3 which was from a different donor mouse. Similarly, there are slight differences in the Hi-C compartment between NKT cells from WT spleen and all three *Tet2/3 DKO* NKT cells taken from the spleen.

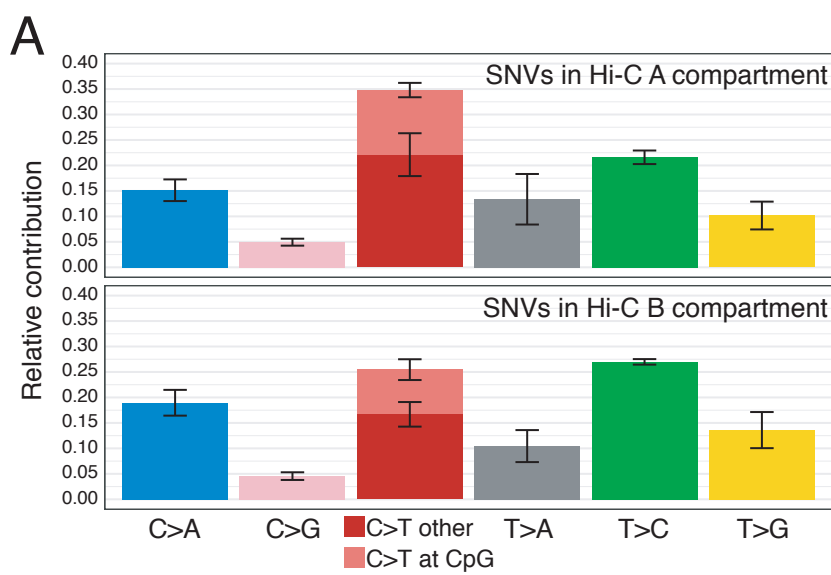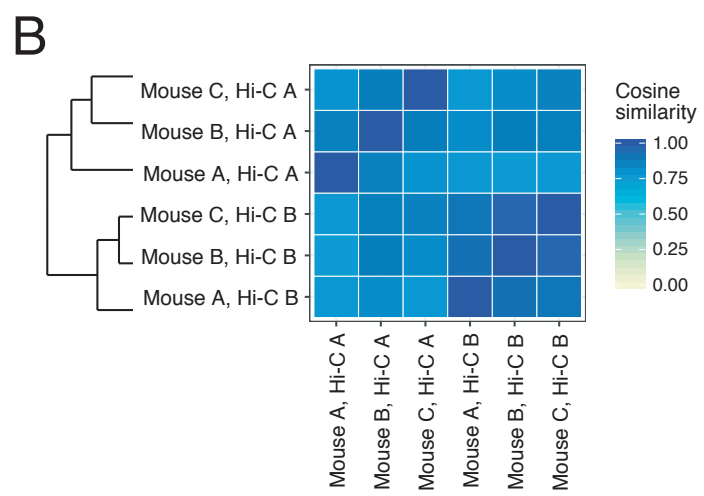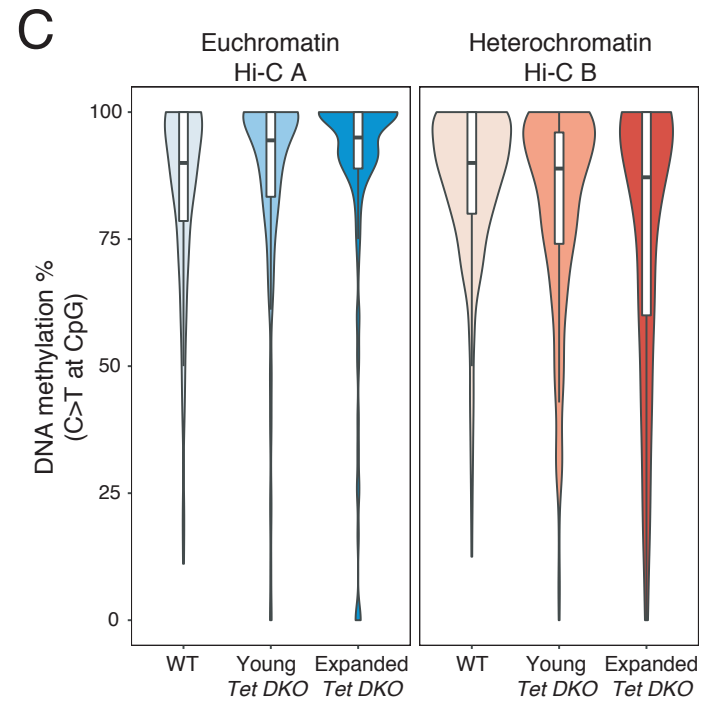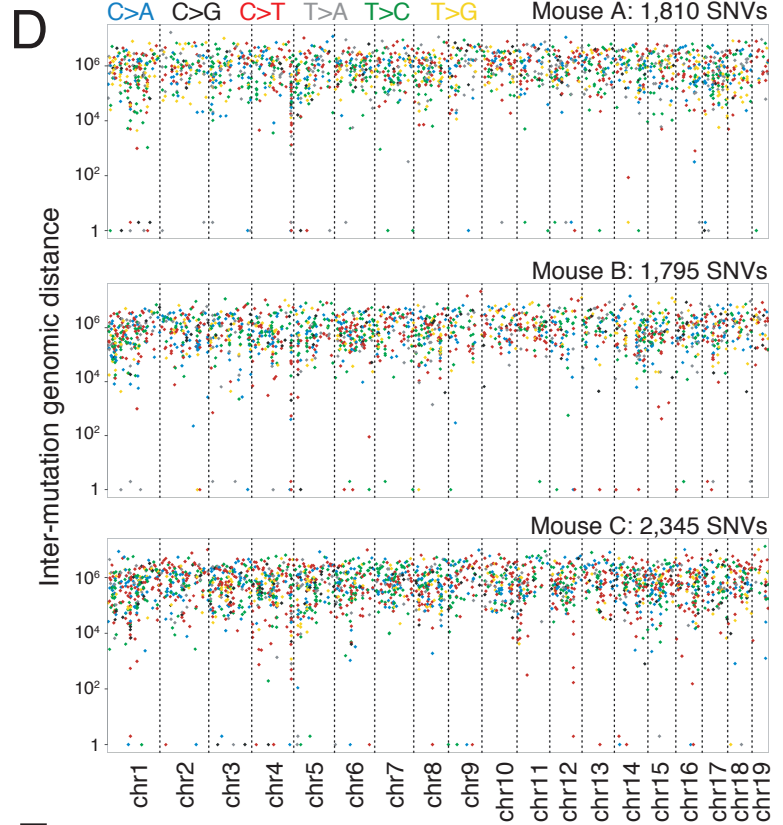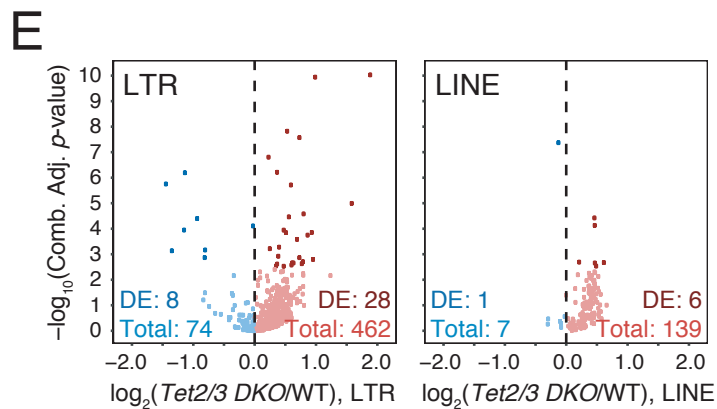

**F**

| Sample  | Coverage | Tail control |
|---------|----------|--------------|
| Mouse A | 47.69    | Matched tail |
| Mouse B | 37.89    | Matched tail |
| Mouse C | 25.48    | Matched tail |
| Mouse D | 20.79    | Unmatched    |
| Mouse E | 18.33    | Unmatched    |

(Legend on next page)

**Fig. S5.** Mutational spectrum of transferred and expanded *Tet2/3 DKO* T cells. (A), Mutational spectrum associated with euchromatic Hi-C A and heterochromatic Hi-C B compartments in *Tet2/3 DKO* expanded NKT cells. (B), Cosine similarity between mutational profiles obtained from three independent *Tet2/3 DKO* expanded T cells WGS samples (matched tail samples, Mouse A-C), separating the mutations by their location within Hi-C compartments (A vs B) in *Tet2/3 DKO* NKT cells. Notice how mutational profiles cluster by Hi-C compartment and not by sample of origin. (C), DNA methylation at cytosines within the CpG context with C>T substitution type. DNA methylation values shown for WT, *Tet2/3 DKO* young, and *Tet2/3 DKO* expanded T cells. (D), Rainfall plots representing the inter-mutational genomic distance (y-axis) for all single nucleotide variants (SNV) (x-axis) encountered in samples Mouse A-C. Substitutions are color-coded as indicated in the top of the figure. While mutations cluster at certain regions, each mice exhibits a unique spectrum of mutations. (E), Distribution of the changes in expression ( $\log_2$  fold change difference) of LTR and LINE transposable elements in *Tet2/3 DKO* young NKT cells compared to WT, obtained from analysis of polyA+ RNA-seq data. *P*-values of two independent experiments (same biological conditions, different library preparation methods, TruSeq and SMART-seq) were combined using the Fisher method. (F), Table with coverage values of WGS samples.

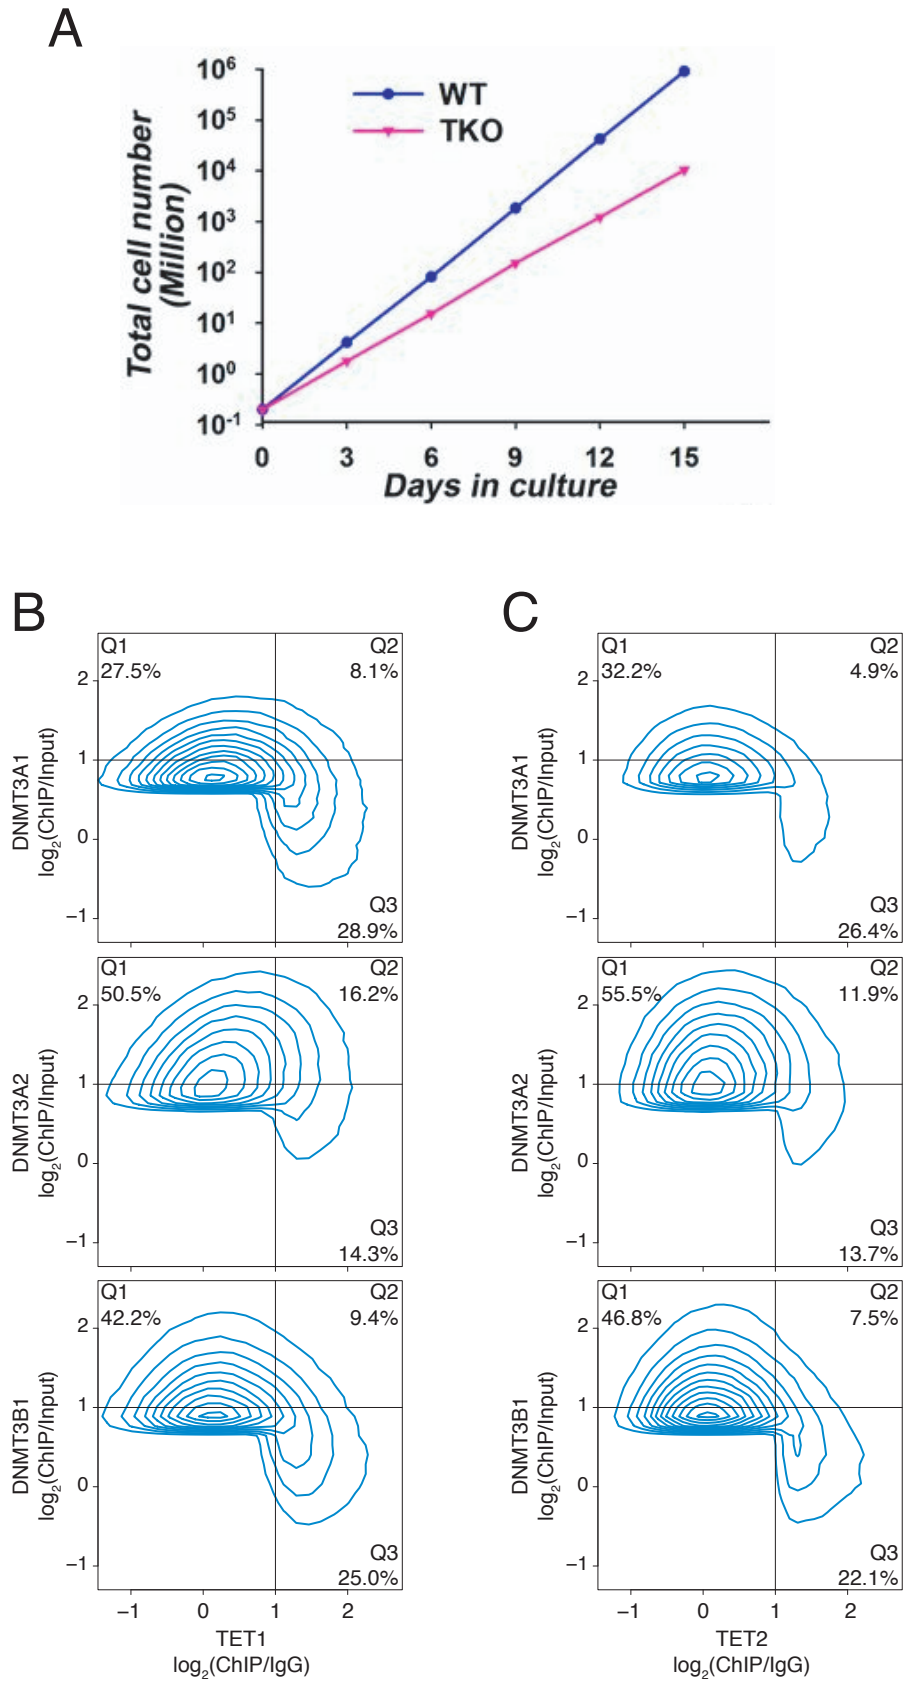

**Fig. S6.** *TET* *TKO* mESC proliferate more slowly than their WT counterparts, and genome-wide distribution of DNMT3 enzymes in relation to TET1 and TET2 in mESC. (A), Growth curves of WT and *Tet1/2/3* *TKO* mESCs. Cells were split every 3 days, and cells were counted. Reprinted from ref. 16. (B-C), Comparison of the localization of DNMT3 proteins versus TET1 (B) and TET2 (C) in WT mESC. ChIP-seq enrichment ( $\log_2$  fold change) was calculated for 1 kb windows. A different dataset (51, 52) was used from that of Fig. 7.

Supplementary table S1. Cell types/Methylomes analyzed in this study

| Cell type | Reference                                 | Laboratory       | Genotype              | Tet1 | Tet2 | Tet3 | Other            |
|-----------|-------------------------------------------|------------------|-----------------------|------|------|------|------------------|
| ESC       | Yin et al, Science, 2017                  | Jussi Taipale    | WT                    | WT   | WT   | WT   |                  |
| ESC       | Yin et al, Science, 2017                  | Jussi Taipale    | Tet1/2/3 TKO          | KO   | KO   | KO   |                  |
| ESC       | Yin et al, Science, 2017                  | Jussi Taipale    | Dnmt1/3a/3b TKO       | WT   | WT   | WT   | DNMT TKO         |
| ESC       | Lu et al, Genome Research, 2014           | Yi Zhang         | WT                    | WT   | WT   | WT   |                  |
| ESC       | Lu et al, Genome Research, 2014           | Yi Zhang         | Tet1/2/3 TKO          | KO   | KO   | KO   |                  |
| ESC       | Hon et al, Molecular Cell, 2014           | Bing Ren         | WT                    | WT   | WT   | WT   |                  |
| ESC       | Hon et al, Molecular Cell, 2014           | Bing Ren         | Tet1 KO               | KO   | WT   | WT   |                  |
| ESC       | Hon et al, Molecular Cell, 2014           | Bing Ren         | Tet2 KO               | WT   | KO   | WT   |                  |
| ESC->NPC  | Hon et al, Molecular Cell, 2014           | Bing Ren         | WT                    | WT   | WT   | WT   |                  |
| ESC->NPC  | Hon et al, Molecular Cell, 2014           | Bing Ren         | Tet2 KO               | WT   | KO   | WT   |                  |
| NKT       | Tsagaratou et al, Nature Immunology, 2017 | Anjana Rao       | WT                    | WT   | WT   | WT   |                  |
| NKT       | Tsagaratou et al, Nature Immunology, 2017 | Anjana Rao       | Tet2/3 DKO (young)    | WT   | KO   | KO   |                  |
| NKT       | This study                                | Anjana Rao       | Tet2/3 DKO (expanded) | WT   | KO   | KO   |                  |
| proB      | Lio et al., eLife, 2016                   | Anjana Rao       | WT                    | WT   | WT   | WT   |                  |
| proB      | Lio et al., eLife, 2016                   | Anjana Rao       | Tet2/3 DKO            | WT   | KO   | KO   |                  |
| HSC       | Jeong et al, Nature Genetics, 2029        | Margaret Goodell | WT                    | WT   | WT   | WT   |                  |
| HSC       | Zhang et al, Nature Genetics, 2016        | Margaret Goodell | Tet2 KO               | WT   | KO   | WT   |                  |
| HSC       | Jeong et al, Nature Genetics, 2029        | Margaret Goodell | Dnmt3a KO             | WT   | WT   | WT   | Dnmt3a KO        |
| HSC       | Zhang et al, Nature Genetics, 2016        | Margaret Goodell | Dnmt3a/Tet2 DKO       | WT   | KO   | WT   | Dnmt3a KO        |
| ESC       | Baubec et al, Nature, 2015                | Dirk Schübeler   | Dnmt TKO+Dnmt3a2      | WT   | WT   | WT   | Dnmt TKO+Dnmt3a2 |
| ESC       | Baubec et al, Nature, 2015                | Dirk Schübeler   | Dnmt TKO+Dnmt3b1      | WT   | WT   | WT   | Dnmt TKO+Dnmt3b1 |
| ESC       | Manzo et al, EMBO J, 2017                 | Tuncay Baubec    | Dnmt TKO+Dnmt3a1      | WT   | WT   | WT   | Dnmt TKO+Dnmt3a1 |

Supplementary table S2: Publicly available datasets used in this study

| Experiment type | Experiment               | Accession Number        | Description                                         | Reference                              | Laboratory                  |
|-----------------|--------------------------|-------------------------|-----------------------------------------------------|----------------------------------------|-----------------------------|
| WGBS            | WGBS_ESC                 | PRJEB9797               | WGBS, WT, Tet TKO and Dnmt TKO mESC                 | Yin et al., 2017                       | Jussi Taipale               |
| WGBS            | WGBS_ESC                 | GSE56986                | WGBS, WT and Tet TKO mESC                           | Lu et al., 2014                        | Yi Zhang                    |
| WGBS            | WGBS_ESC                 | GSE48519                | WGBS, WT, Tet1 KO and Tet2 KO mESC                  | Hon et al., 2014                       | Bing Ren                    |
| WGBS            | WGBS_NKT                 | GSE66834                | WGBS, WT and young Tet2/3 DKO NKT cells             | Tsagaratou et al., 2017                | Anjana Rao                  |
| WGBS            | WGBS_HSC                 | GSE49714                | WGBS, WT and Dnmt3a HSC                             | Jeong et al., 2014                     | Margaret Goodell            |
| WGBS            | WGBS_HSC                 | GSE72148                | WGBS, Tet2 KO and Tet2/Dnmt3a KO HSC                | Zhang et al., 2016                     | Margaret Goodell            |
| WGBS            | WGBS_NPC                 | GSE48519                | WGBS, WT and Tet2 KO, mESC->NPC                     | Hon et al., 2014                       | Bing Ren                    |
| WGBS            | WGBS_proB                | SRP076056               | WGBS, WT and Tet2/3 DKO proB cells                  | Lio et al., 2017                       | Anjana Rao                  |
| WGBS            | WGBS_ESC_DNMT_TKO        | GSE57411                | WGBS, DNMT TKO ESC, TKO+DNMT3A2, TKO+DNMT3B1        | Baubec et al., 2015                    | Dirk Schübeler              |
| WGBS            | WGBS_ESC_DNMT_TKO        | GSE96087                | WGBS, DNMT TKO ESC, TKO+DNMT3A1                     | Manzo et al., 2017                     | Tuncay Baubec               |
| Hi-C            | HiC_ESC                  | GSE96107                | Hi-C, ESC                                           | Bonev et al., 2017                     | Giacomo Cavalli             |
| Hi-C            | HiC_HSC                  | GSE79422                | HiC, HSC                                            | Hu et al., 2018                        | Keji Zhao                   |
| Hi-C            | HiC_NPC                  | GSE96107                | Hi-C, NPC                                           | Bonev et al., 2017                     | Giacomo Cavalli             |
| Hi-C            | HiC_proB                 | GSE40173                | Hi-C pro-B, method: FA and EGS                      | Lin et al., 2012                       | Cornelius Murre/Chris Glass |
| RNA-seq         | RNA_ESC                  | GSE48519                | RNAseq, WT mESC                                     | Hon et al., 2014                       | Bing Ren                    |
| RNA-seq         | RNA_HSC                  | GSE49714                | RNAseq, WT HSC                                      | Jeong et al., 2014                     | Margaret Goodell            |
| RNA-seq         | RNA_NKT                  | GSE66834                | RNAseq, SMARTseq, WT and young Tet2/3 DKO NKT cells | Tsagaratou et al., 2017                | Anjana Rao                  |
| RNA-seq         | RNA_NKT                  | GSE66834                | RNAseq, Truseq, WT and young Tet2/3 DKO NKT cells   | Tsagaratou et al., 2017                | Anjana Rao                  |
| GRO-seq         | GRO_proB                 | GSE40173                | GRO-seq pro-B                                       | Lin et al., 2012                       | Cornelius Murre/Chris Glass |
| CMS-IP-seq      | CMS_HSC                  | GSE49714                | CMS-IP, WT HSC                                      | Jeong et al., 2014                     | Margaret Goodell            |
| CMS-IP-seq      | CMS_NKT                  | GSE66834                | CMS-IP, WT NKT cells                                | Tsagaratou et al., 2017                | Anjana Rao                  |
| CMS-IP-seq      | CMS_proB                 | SRP076056               | CMS-IP, WT proB cells                               | Lio et al., 2017                       | Anjana Rao                  |
| TAB-seq         | TAB_ESC                  | GSE48519                | TABseq, WT mESC                                     | Hon et al., 2014                       | Bing Ren                    |
| ATAC-seq        | ATAC_NKT                 | GSE66834                | ATACseq, WT and young Tet2/3 DKO NKT cells          | Tsagaratou et al., 2017                | Anjana Rao                  |
| ChIP-seq        | ChIP_H3K27me3_ESC        | ENCSR059MBO/ENCSR326ULS | ChIP for H3K27me3 and Input, E14 mESC               | ENCODE                                 | ENCODE                      |
| ChIP-seq        | ChIP_H3K9me2_ESC         | GSE97877                | ChIP for H3K9me2, mESC                              | Poleshko et al., 2017                  | Rajan Jain                  |
| ChIP-seq        | ChIP_LaminB_ESC          | GSE97877                | ChIP for LaminB, mESC                               | Poleshko et al., 2017                  | Rajan Jain                  |
| ChIP-seq        | ChIP_Dnmt3a1_ESC         | GSE100951               | ChIP for Dnmt3a1, WT and Tet1 KO mESC               | Gu et al., 2018                        | Margaret Goodell            |
| ChIP-seq        | ChIP_Dnmt3a1_ESC         | GSE96527                | ChIP for Dnmt3a1 and input in WT mESC               | Manzo et al, EMBO J, 2017              | Tuncay Baubec               |
| ChIP-seq        | ChIP_Dnmt3a2_Dnmt3b1_ESC | GSE57412                | ChIP for Dnmt3a2 and Dnmt3b1 in WT mESC             | Baubec et al, Nature, 2015             | Dirk Schübeler              |
| ChIP-seq        | ChIP_Tet1_ESC            | GSE24841                | ChIP for Tet1 (N-terminal antibody) and IgG control | Williams et al, Nature, 2011           | Kristian Helin              |
| ChIP-seq        | ChIP_Tet2_ESC            | GSE115964               | ChIP for Tet2 (N-terminal antibody) and IgG control | Rasmussen et al, Genome Research, 2019 | Kristian Helin              |



Supplementary table S3: Datasets generated in this study

| <b>Experiment type</b> | <b>Experiment</b>                  | <b>Description</b>                                                                             |
|------------------------|------------------------------------|------------------------------------------------------------------------------------------------|
| WGBS                   | WGBS_Tet2/3_DKO_NKT_expanded       | WGBS in Tet2/3 DKO NKT cells expanded in immunocompetent recipients, two biological replicates |
| Hi-C                   | Hi-C_NKT_WT_thymus                 | Hi-C in WT thymic NKT cells                                                                    |
| Hi-C                   | Hi-C_NKT_WT_spleen                 | Hi-C in WT splenic NKT cells                                                                   |
| Hi-C                   | Hi-C_NKT_Tet2/3_DKO_NKT_expanded   | Hi-C in Tet2/3 DKO NKT cells expanded in immunocompetent recipients                            |
| RNA-seq                | Total_RNA_seq_NKT_WT_thymus        | Ribodepleted RNA-seq in WT thymic NKT cells from young animals (3-4 week old)                  |
| RNA-seq                | Total_RNA_seq_NKT_Tet2/3_DKO_young | Ribodepleted RNA-seq in Tet2/3 DKO thymic NKT cells from young animals (3-4 week old)          |

Supplementary table S4: Bisulfite conversion rates of methylomes analyzed in this study

| <b>Cell type</b> | <b>Reference</b>                          | <b>Laboratory</b> | <b>Genotype</b>       | <b>Bisulfite conversion %</b> |
|------------------|-------------------------------------------|-------------------|-----------------------|-------------------------------|
| ESC              | Yin et al, Science, 2017                  | Jussi Taipale     | WT                    | 99.27061                      |
| ESC              | Yin et al, Science, 2017                  | Jussi Taipale     | Tet1/2/3 TKO          | 98.23677                      |
| ESC              | Yin et al, Science, 2017                  | Jussi Taipale     | Dnmt1/3a/3b TKO       | 98.83685                      |
| ESC              | Lu et al, Genome Research, 2014           | Yi Zhang          | WT                    | 99.77342                      |
| ESC              | Lu et al, Genome Research, 2014           | Yi Zhang          | Tet1/2/3 TKO          | 99.82283                      |
| ESC              | Hon et al, Molecular Cell, 2014           | Bing Ren          | WT                    | 99.60175                      |
| ESC              | Hon et al, Molecular Cell, 2014           | Bing Ren          | Tet1 KO               | 99.57533                      |
| ESC              | Hon et al, Molecular Cell, 2014           | Bing Ren          | Tet2 KO               | 99.70923                      |
| NKT              | Tsagaratou et al, Nature Immunology, 2017 | Anjana Rao        | WT                    | 99.88858                      |
| NKT              | Tsagaratou et al, Nature Immunology, 2017 | Anjana Rao        | Tet2/3 DKO (young)    | 99.92096                      |
| NKT              | This study                                | Anjana Rao        | Tet2/3 DKO (expanded) | 99.92077                      |
| proB             | Lio et al., eLife, 2016                   | Anjana Rao        | WT                    | 99.27433                      |
| proB             | Lio et al., eLife, 2016                   | Anjana Rao        | Tet2/3 DKO            | 99.28012                      |

Supplementary table S5: Differential expression analysis of methylation-related genes

| Genes         | Tet1 vs WT, mESC, Hon et al. 2014 |              |                 | Tet2 vs WT, mESC, Hon et al. 2014 |              |                 | TetTKO vs WT, mESC, Lu et al. 2014 |              |                 | Tet2/3 DKO vs WT, thymic NKT (young), Tsagaratou et al. 2017 |              |                 | Tet2/3 DKO vs WT, splenic NKT (expanded), Tsagaratou et al. 2017 |              |                 | Tet2_KO vs WT, HSPC, Zhang et al. 2016 |             |                 |
|---------------|-----------------------------------|--------------|-----------------|-----------------------------------|--------------|-----------------|------------------------------------|--------------|-----------------|--------------------------------------------------------------|--------------|-----------------|------------------------------------------------------------------|--------------|-----------------|----------------------------------------|-------------|-----------------|
|               | log2FoldChange                    | Pvalue       | Adjusted Pvalue | log2FoldChange                    | Pvalue       | Adjusted Pvalue | log2FoldChange                     | Pvalue       | Adjusted Pvalue | log2FoldChange                                               | Pvalue       | Adjusted Pvalue | log2FoldChange                                                   | Pvalue       | Adjusted Pvalue | log2FoldChange                         | Pvalue      | Adjusted Pvalue |
| <b>Dnmt1</b>  | -0.3832762                        | 0.3781573    | 0.9990316       | -0.09535718                       | 0.8465288    | 0.9870463       | 0.007848649                        | 0.989245     | 0.9973187       | 0.01416653                                                   | 0.9669503    | 0.994908        | 1.089568                                                         | 0.01240315   | 0.09766158      | 0.5402262                              | 0.005055256 | 0.02493475      |
| <b>Dnmt3a</b> | 0.2293185                         | 0.5952186    | 0.9990316       | 0.1680226                         | 0.7548926    | 0.9818612       | 0.1354289                          | 0.8188068    | 0.9973187       | 0.07421201                                                   | 0.8496613    | 0.993813        | 1.201698                                                         | 0.0757458    | 0.3363919       | 0.1922322                              | 0.38997     | 0.5784337       |
| <b>Dnmt3b</b> | Not detected                      | Not detected | Not detected    | Not detected                      | Not detected | Not detected    | 0.8917121                          | 0.1314702    | 0.9973187       | Not detected                                                 | Not detected | Not detected    | Not detected                                                     | Not detected | Not detected    | 0.5088264                              | 0.03237024  | 0.1020628       |
| <b>Tet1</b>   | KO                                | KO           | KO              | 0.1808895                         | 0.5833723    | 0.9609881       | KO                                 | KO           | KO              | Not detected                                                 | Not detected | Not detected    | Not detected                                                     | Not detected | Not detected    | 0.1598554                              | 0.5916572   | 0.7458601       |
| <b>Tet2</b>   | 0.1941287                         | 0.6563286    | 0.9990316       | KO                                | KO           | KO              | KO                                 | KO           | KO              | KO                                                           | KO           | KO              | KO                                                               | KO           | KO              | KO                                     | KO          | KO              |
| <b>Tet3</b>   | -0.07295958                       | 0.8554356    | NA              | -0.05068782                       | 0.9251563    | NA              | KO                                 | KO           | KO              | KO                                                           | KO           | KO              | KO                                                               | KO           | KO              | 0.6914659                              | 0.0204745   | 0.07246841      |
| <b>Idh1</b>   | 0.6290385                         | 0.08422165   | NA              | Not detected                      | Not detected | Not detected    | 0.1277666                          | 0.8284318    | 0.9973187       | Not detected                                                 | Not detected | Not detected    | Not detected                                                     | Not detected | Not detected    | 0.2519771                              | 0.3018423   | 0.4913999       |
| <b>Idh2</b>   | 0.2216031                         | 0.610965     | 0.9990316       | 0.2409174                         | 0.6491521    | 0.9640058       | Not detected                       | Not detected | Not detected    | Not detected                                                 | Not detected | Not detected    | Not detected                                                     | Not detected | Not detected    | 0.4151734                              | 8.29E-06    | 0.0001229698    |
| <b>Uhrf1</b>  | 1.047607                          | 0.0158462    | 0.4789873       | 1.161828                          | 0.02476095   | 0.4002242       | -0.02180673                        | 0.9682552    | 0.9973187       | 0.2084523                                                    | 0.6176339    | NA              | 2.858565                                                         | 0.0007859357 | 0.01117721      | 0.6577167                              | 0.00365927  | 0.01924505      |

Supplementary table S6: Summary of DNA methylation changes in TET-deficient models

| <b>TET-deficient models</b>           |                                      |                 |                           |                              |          |         |           |       |
|---------------------------------------|--------------------------------------|-----------------|---------------------------|------------------------------|----------|---------|-----------|-------|
| Cell type                             | Compartment                          | Comparison      | Min.                      | 1st Qu.                      | Median   | Mean    | 3rd Qu.   | Max   |
| HSC                                   | Euchromatin                          | Tet2 KO%-WT%    | -46.87                    | -2.699                       | -0.4847  | -0.4456 | 1.719     | 36.18 |
| HSC                                   | Heterochromatin                      | Tet2 KO%-WT%    | -44.97                    | -5.712                       | -2.134   | -2.451  | 1.105     | 31.63 |
| ESC (Yin, 2017)                       | Euchromatin                          | Tet TKO%-WT%    | -25.46                    | -4.114                       | -1.75    | -1.27   | 1.046     | 46.12 |
| ESC (Yin, 2017)                       | Heterochromatin                      | Tet TKO%-WT%    | -28.33                    | -7.683                       | -4.906   | -5.135  | -2.439    | 30.55 |
| ESC (Hon, 2014)                       | Euchromatin                          | Tet1 KO%-WT%    | -64.55                    | -12.36                       | -9.746   | -9.661  | -6.95     | 44.8  |
| ESC (Hon, 2014)                       | Heterochromatin                      | Tet1 KO%-WT%    | -58.62                    | -17.16                       | -13.9    | -13.98  | -10.76    | 31.28 |
| ESC (Hon, 2014)                       | Euchromatin                          | Tet2 KO%-WT%    | -69.55                    | -11.55                       | -7.923   | -7.469  | -3.639    | 49.84 |
| ESC (Hon, 2014)                       | Heterochromatin                      | Tet2 KO%-WT%    | -70.5                     | -19.5                        | -15.89   | -15.73  | -12.12    | 39.47 |
| ESC (Lu, 2014)                        | Euchromatin                          | Tet TKO%-WT%    | -39.01                    | -8                           | -4.595   | -3.932  | -0.4709   | 48.23 |
| ESC (Lu, 2014)                        | Heterochromatin                      | Tet TKO%-WT%    | -38.51                    | -12.25                       | -8.92    | -8.929  | -5.681    | 51.18 |
| ESC->NPC                              | Euchromatin                          | Tet2 KO%-WT%    | -45.06                    | -1.663                       | -0.01705 | -0.1791 | 1.526     | 66    |
| ESC->NPC                              | Heterochromatin                      | Tet2 KO%-WT%    | -60.26                    | -4.71                        | -1.92    | -2.335  | 0.4641    | 39.76 |
| NKT (young)                           | Euchromatin                          | Tet2/3 DKO%-WT% | -38.66                    | 0.4957                       | 2.852    | 3.313   | 5.759     | 47.5  |
| NKT (young)                           | Heterochromatin                      | Tet2/3 DKO%-WT% | -29.31                    | -8.386                       | -5.889   | -5.717  | -3.314    | 26.29 |
| NKT (expanded)                        | Euchromatin                          | Tet2/3 DKO%-WT% | -41.28                    | 0.8537                       | 4.264    | 4.729   | 8.743     | 66.02 |
| NKT (expanded)                        | Heterochromatin                      | Tet2/3 DKO%-WT% | -62.43                    | -19.64                       | -14.86   | -14.12  | -9.627    | 41.52 |
| proB cells                            | Euchromatin                          | Tet2/3 DKO%-WT% | -21.15                    | -0.9866                      | 0.1347   | 0.2238  | 1.336     | 29.64 |
| proB cells                            | Heterochromatin                      | Tet2/3 DKO%-WT% | -16.19                    | -3.607                       | -1.804   | -1.768  | -0.000231 | 27.31 |
| <b>Human data (data from ref. 22)</b> |                                      |                 |                           |                              |          |         |           |       |
| Source                                | Cancer type                          | Patient         | Highly Methylated Domains | Partially Methylated Domains |          |         |           |       |
| BLUEPRINT consortium                  | T cell<br>Prolymphocytic<br>Leukemia | S016KWU1        | 73.6628916                | 58.6744841                   |          |         |           |       |
| BLUEPRINT consortium                  | T cell<br>Prolymphocytic<br>Leukemia | S016MSU1        | 76.2613685                | 52.8102417                   |          |         |           |       |
| BLUEPRINT consortium                  | T cell<br>Prolymphocytic<br>Leukemia | S016KWU1        | 67.8747499                | 37.7524849                   |          |         |           |       |

## References

1. Y. Xi, W. Li, BSMAP: whole genome bisulfite sequence MAPping program. *BMC Bioinformatics* **10**, 232 (2009).
2. X. Lin *et al.*, BSeQC: quality control of bisulfite sequencing experiments. *Bioinformatics* **29**, 3227-3229 (2013).
3. S. Heinz *et al.*, Simple combinations of lineage-determining transcription factors prime cis-regulatory elements required for macrophage and B cell identities. *Mol Cell* **38**, 576-589 (2010).
4. H. Li, R. Durbin, Fast and accurate long-read alignment with Burrows-Wheeler transform. *Bioinformatics* **26**, 589-595 (2010).
5. M. Lienhard, C. Grimm, M. Morkel, R. Herwig, L. Chavez, MEDIPS: genome-wide differential coverage analysis of sequencing data derived from DNA enrichment experiments. *Bioinformatics* **30**, 284-286 (2014).
6. I. Hiratani *et al.*, Global reorganization of replication domains during embryonic stem cell differentiation. *PLoS Biol* **6**, e245 (2008).
7. D. Peric-Hupkes *et al.*, Molecular maps of the reorganization of genome-nuclear lamina interactions during differentiation. *Mol Cell* **38**, 603-613 (2010).
8. A. Dobin *et al.*, STAR: ultrafast universal RNA-seq aligner. *Bioinformatics* **29**, 15-21 (2013).
9. Y. Jin, O. H. Tam, E. Paniagua, M. Hammell, TETranscripts: a package for including transposable elements in differential expression analysis of RNA-seq datasets. *Bioinformatics* **31**, 3593-3599 (2015).
10. M. I. Love, W. Huber, S. Anders, Moderated estimation of fold change and dispersion for RNA-seq data with DESeq2. *Genome Biol* **15**, 550 (2014).
11. A. McKenna *et al.*, The Genome Analysis Toolkit: a MapReduce framework for analyzing next-generation DNA sequencing data. *Genome Res* **20**, 1297-1303 (2010).
12. K. Cibulskis *et al.*, Sensitive detection of somatic point mutations in impure and heterogeneous cancer samples. *Nat Biotechnol* **31**, 213-219 (2013).
13. F. Blokzijl, R. Janssen, R. van Boxtel, E. Cuppen, MutationalPatterns: comprehensive genome-wide analysis of mutational processes. *Genome Med* **10**, 33 (2018).
14. K. Wang, M. Li, H. Hakonarson, ANNOVAR: functional annotation of genetic variants from high-throughput sequencing data. *Nucleic Acids Res* **38**, e164 (2010).
15. M. Ko *et al.*, Ten-Eleven-Translocation 2 (TET2) negatively regulates homeostasis and differentiation of hematopoietic stem cells in mice. *Proc Natl Acad Sci U S A* **108**, 14566-14571 (2011).
16. M. Ko *et al.*, TET proteins and 5-methylcytosine oxidation in hematological cancers. *Immunol Rev* **263**, 6-21 (2015).
17. P. P. Lee *et al.*, A critical role for Dnmt1 and DNA methylation in T cell development, function, and survival. *Immunity* **15**, 763-774 (2001).
18. C. Plessy *et al.*, clonotypeR—high throughput analysis of T cell antigen receptor sequences. *bioRxiv*. doi: [10.1101/028696](https://doi.org/10.1101/028696) (2015).
